# Supplementary material for: Cisplatin combination drugs induce autophagy in HeLa cells and interact with HSA via electrostatic binding affinity
Source: Royal Society of Chemistry journal article supplement (doi:10.1039/c7ra00056a), 2017-01-01
Supplement: c7ra00056a1.pdf [file c7ra00056a1.pdf]

# Cisplatin Combination Drugs Induce Autophagy on HeLa Cells and Interact with HSA via Electrostatic Binding Affinity†

Xuerui Chen, † Li Zhang, † Shiping Ding, ‡ Qunfang Lei\*† and Wenjun Fang\*†

†Department of Chemistry, Zhejiang University, Hangzhou 310027, P. R. China;

‡School of Medicine, Zhejiang University, Hangzhou 310058, P. R. China

Email address: [fwjun@zju.edu.cn](mailto:fwjun@zju.edu.cn), [qflel@zju.edu.cn](mailto:qflel@zju.edu.cn).

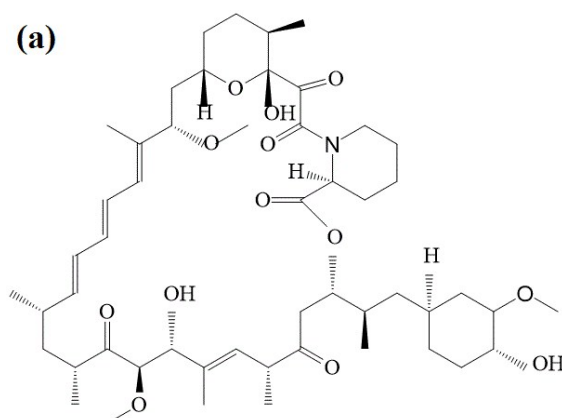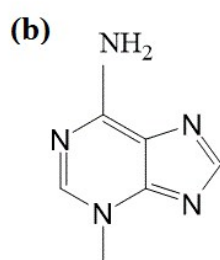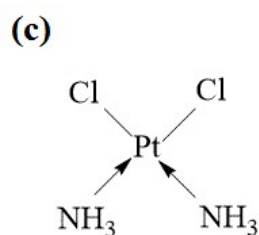

**Fig. S1** The structure of (a) RAPA, (b) 3-MA and (c) cisplatin.

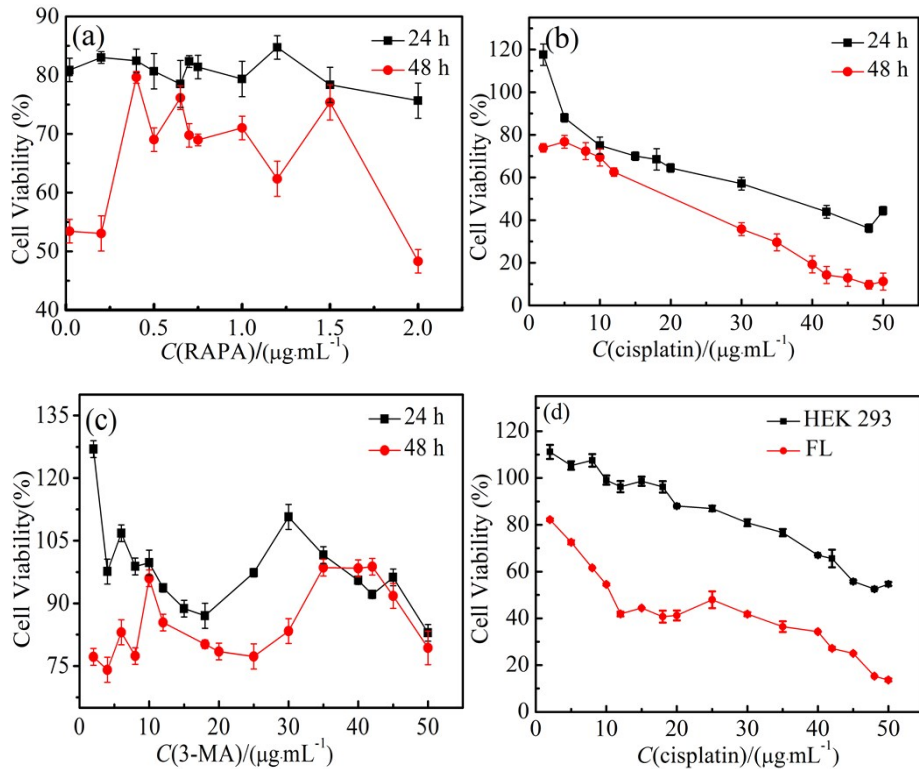

**Fig. S2** Cell viability of HeLa cells exposed to drugs with different concentrations (C) for 24 h or 48 h. (a) RAPA; (b) cisplatin; (c) 3-MA. Cell viability of HEK 293 cells and FL cells exposed to (d) cisplatin for 24 h. Data are presented as mean  $\pm$  SD of five independent results.

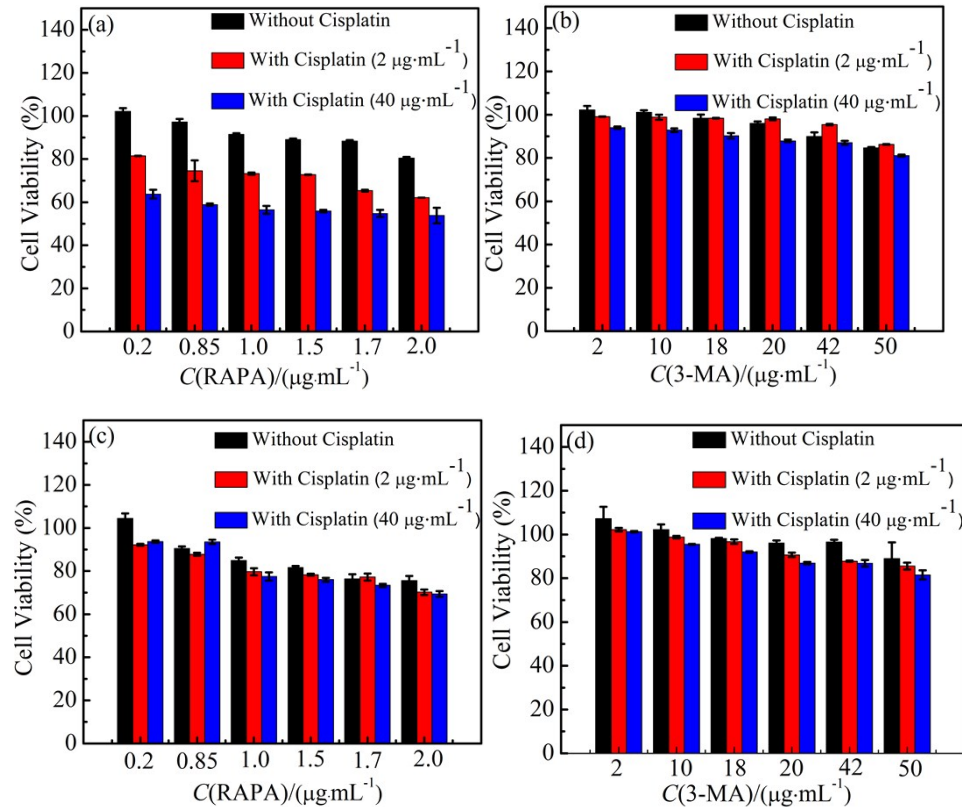

**Fig. S3** Cell viability of (a, b) HEK 293 cells and (c, d) FL cells exposed to cisplatin combination drugs for 24 h. (a, c) RAPA combination drugs, cisplatin wt% ranging from 90.00 to 50.00 (cisplatin  $2.0 \mu\text{g}\cdot\text{mL}^{-1}$ + RAPA ranging from  $0.2 \mu\text{g}\cdot\text{mL}^{-1}$  to  $2.0 \mu\text{g}\cdot\text{mL}^{-1}$ ); (b, d) 3-MA combination drugs, cisplatin wt% ranging from 50.00 to 3.846 (cisplatin  $2.0 \mu\text{g}\cdot\text{mL}^{-1}$ + 3-MA ranging from  $2.0 \mu\text{g}\cdot\text{mL}^{-1}$  to  $50 \mu\text{g}\cdot\text{mL}^{-1}$ ).

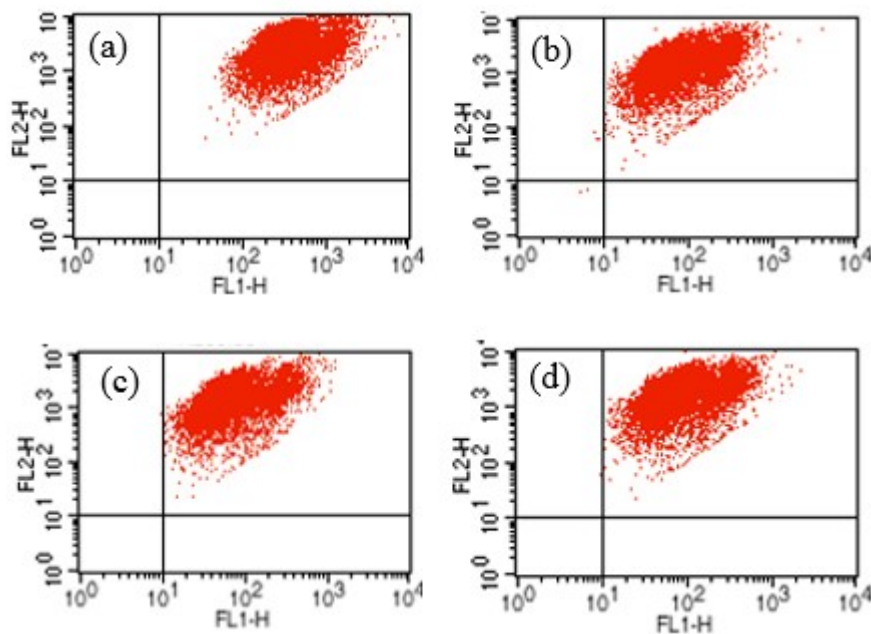

**Fig. S4** The fluorescence lights of green and red on HeLa cells treated with RAPA. (a) control; (b)  $0.02 \mu\text{g}\cdot\text{mL}^{-1}$ ; (c)  $0.2 \mu\text{g}\cdot\text{mL}^{-1}$ ; (d)  $1.0 \mu\text{g}\cdot\text{mL}^{-1}$ .

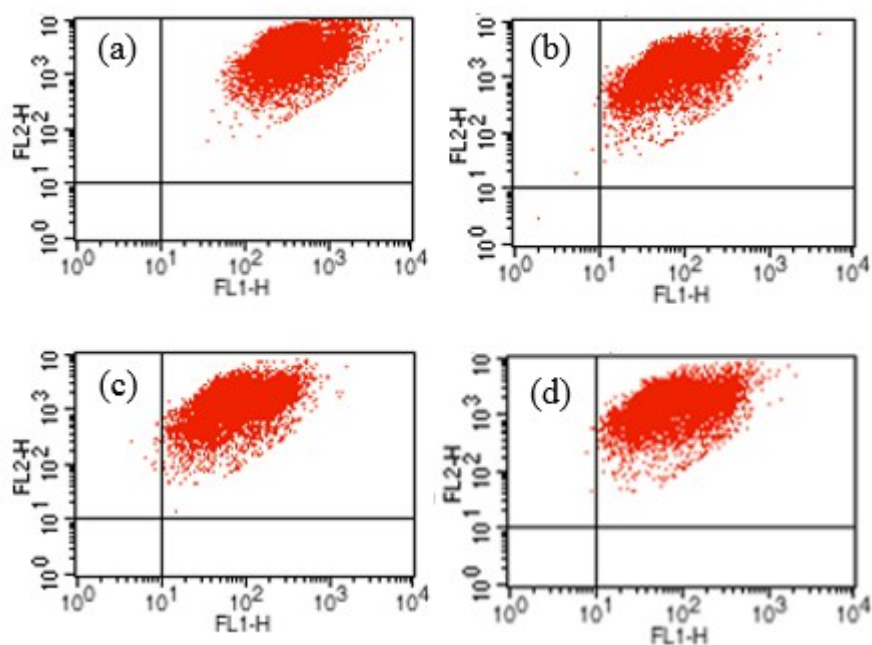

**Fig. S5** The fluorescence lights of green and red on HeLa cells treated with cisplatin ( $2 \mu\text{g}\cdot\text{mL}^{-1}$ ) combined with RAPA. (a) control; (b)  $0.02 \mu\text{g}\cdot\text{mL}^{-1}$ ; (c)  $0.2 \mu\text{g}\cdot\text{mL}^{-1}$ ; (d)  $1.0 \mu\text{g}\cdot\text{mL}^{-1}$ .

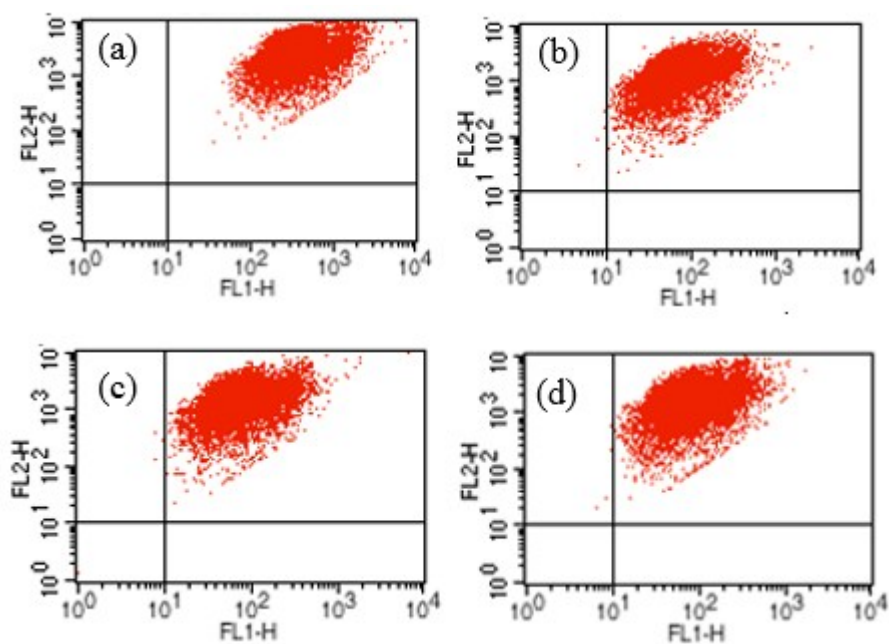

**Fig. S6** The fluorescence lights of green and red on HeLa cells treated with 3-MA. (a) control; (b)  $0.2 \mu\text{g}\cdot\text{mL}^{-1}$ ; (c)  $2.0 \mu\text{g}\cdot\text{mL}^{-1}$ ; (d)  $20 \mu\text{g}\cdot\text{mL}^{-1}$ .

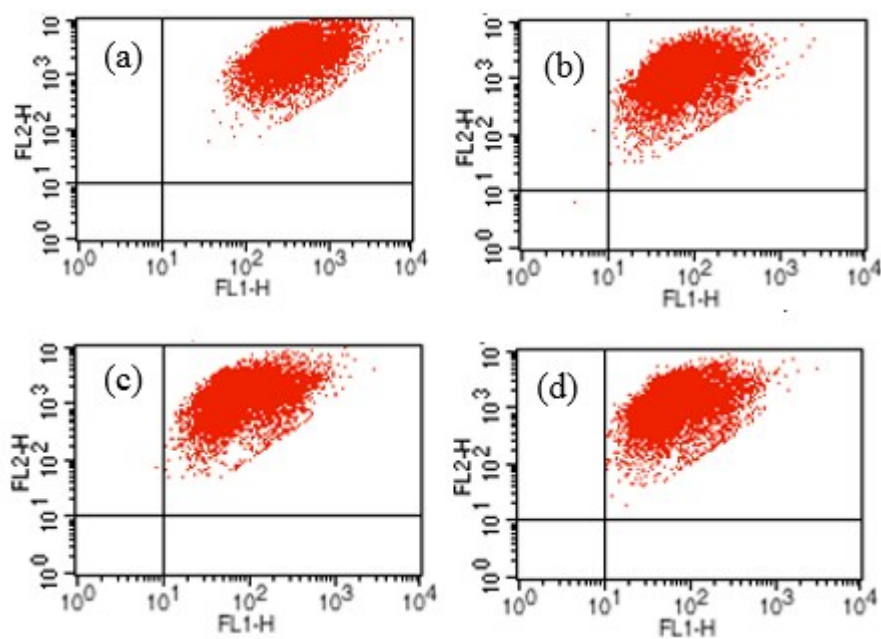

**Fig. S7** The fluorescence lights of green and red on HeLa cells treated with cisplatin ( $2 \mu\text{g}\cdot\text{mL}^{-1}$ ) combined with 3-MA. (a) control; (b)  $0.2 \mu\text{g}\cdot\text{mL}^{-1}$ ; (c)  $2.0 \mu\text{g}\cdot\text{mL}^{-1}$ ; (d)  $20 \mu\text{g}\cdot\text{mL}^{-1}$ .

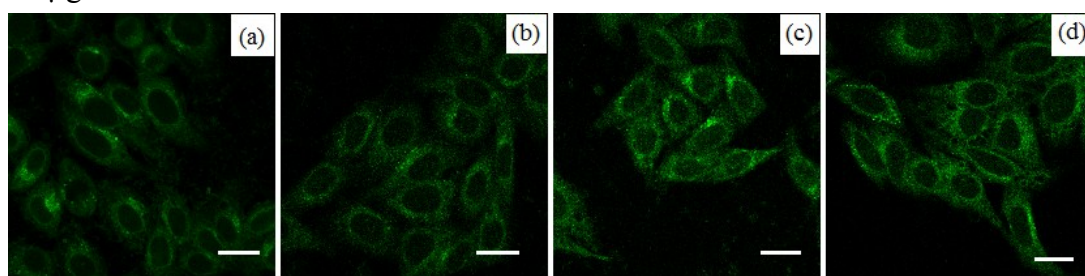

**Fig. S8** Autophagic vesicles in HeLa cells exposed to RAPA from MDC staining assay observed under confocal microscopy (scale bars, 20  $\mu\text{m}$ ). (a) control; (b) 0.02  $\mu\text{g}\cdot\text{mL}^{-1}$ ; (c) 0.2  $\mu\text{g}\cdot\text{mL}^{-1}$ ; (d) 1.0  $\mu\text{g}\cdot\text{mL}^{-1}$ .

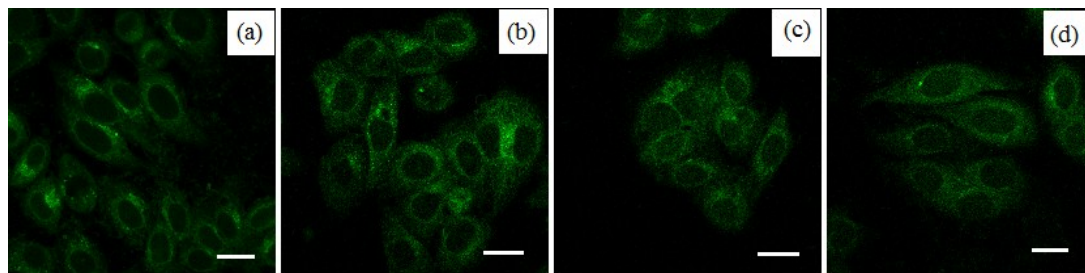

**Fig. S9** Autophagic vesicles in HeLa cells exposed to 3-MA from MDC staining assay observed under confocal microscopy (scale bars, 20  $\mu\text{m}$ ). (a) control; (b) 0.2  $\mu\text{g}\cdot\text{mL}^{-1}$ ; (c) 2.0  $\mu\text{g}\cdot\text{mL}^{-1}$ ; (d) 20  $\mu\text{g}\cdot\text{mL}^{-1}$ .

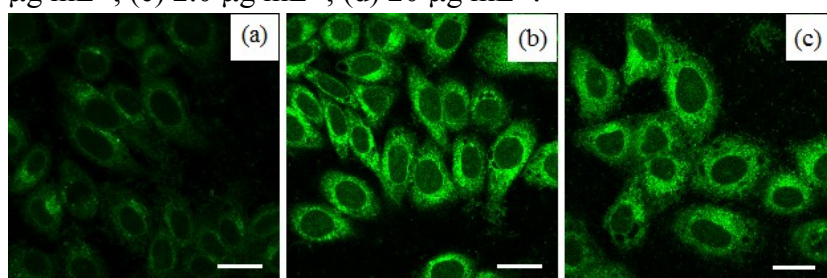

**Fig. S10** Autophagic vesicles in HeLa cells exposed to cisplatin from MDC staining assay observed under confocal microscopy (scale bars, 20  $\mu\text{m}$ ). (a) control; (b) 2  $\mu\text{g}\cdot\text{mL}^{-1}$ ; (c) 10  $\mu\text{g}\cdot\text{mL}^{-1}$ .

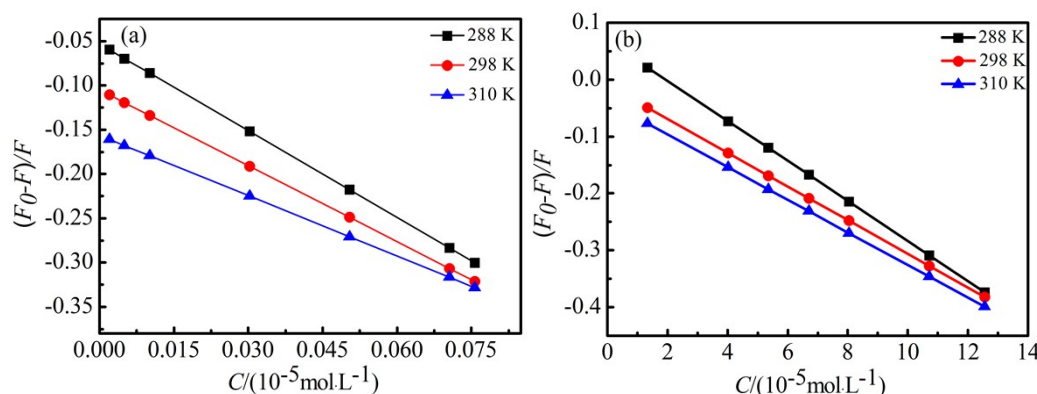

**Fig. S11** Stern-Volme curves of the binding of cisplatin combination drugs to HSA, (a) RAPA combination drugs, (b) 3-MA combination drugs.

**Table S1.** CI values for HeLa cell lines treated with cisplatin combination drugs.

| Cisplatin<br>( $\mu\text{g}\cdot\text{mL}^{-1}$ ) | 3-MA<br>( $\mu\text{g}\cdot\text{mL}^{-1}$ ) | CI   | Cisplatin<br>( $\mu\text{g}\cdot\text{mL}^{-1}$ ) | RAPA<br>( $\mu\text{g}\cdot\text{mL}^{-1}$ ) | CI   |
|---------------------------------------------------|----------------------------------------------|------|---------------------------------------------------|----------------------------------------------|------|
| 2.00                                              | 2.00                                         | 2.09 | 2.00                                              | 0.20                                         | 0.18 |

|       |       |      |       |      |      |
|-------|-------|------|-------|------|------|
| 2.00  | 10.00 | 3.52 | 2.00  | 0.85 | 0.16 |
| 2.00  | 18.00 | 3.51 | 2.00  | 1.00 | 0.12 |
| 2.00  | 20.00 | 2.57 | 2.00  | 1.50 | 0.11 |
| 2.00  | 42.00 | 1.75 | 2.00  | 1.70 | 0.10 |
| 2.00  | 50.00 | 1.19 | 2.00  | 2.00 | 0.01 |
| 40.00 | 2.00  | 5.68 | 40.00 | 0.20 | 3.10 |
| 40.00 | 10.00 | 4.29 | 40.00 | 0.85 | 2.65 |
| 40.00 | 18.00 | 3.24 | 40.00 | 1.00 | 1.34 |
| 40.00 | 20.00 | 2.51 | 40.00 | 1.50 | 1.32 |
| 40.00 | 42.00 | 4.32 | 40.00 | 1.70 | 1.24 |
| 40.00 | 50.00 | 2.97 | 40.00 | 2.00 | 1.12 |

**Table S2** Stern-Volmer quenching constants of cisplatin combination drugs binding to HSA and the free-energy change ( $\Delta G^\circ$ ), enthalpy change ( $\Delta H^\circ$ ) and the entropy change ( $\Delta S^\circ$ )

| Drugs          | $K_q \times 10^{12}$<br>( $M^{-1}s^{-1}$ ) | $K_{sv} \times 10^3$<br>( $M^{-1}$ ) | $T$<br>(K) | $\Delta H^\circ$<br>( $kJ \cdot mol^{-1}$ ) | $\Delta G^\circ$<br>( $kJ \cdot mol^{-1}$ ) | $\Delta S^\circ$<br>( $J \cdot mol^{-1} \cdot K^{-1}$ ) |
|----------------|--------------------------------------------|--------------------------------------|------------|---------------------------------------------|---------------------------------------------|---------------------------------------------------------|
| 3-MA+Cisplatin |                                            |                                      | 288        |                                             | -20.23                                      |                                                         |
|                | 0.30                                       | 2.97                                 | 298        | -13.71                                      | -20.50                                      | 22.61                                                   |
|                |                                            |                                      | 310        |                                             | -20.72                                      |                                                         |
| RAPA+Cisplatin |                                            |                                      | 288        |                                             | -31.25                                      |                                                         |
|                | 28.59                                      | 285.88                               | 298        | -10.06                                      | -31.13                                      | 73.56                                                   |
|                |                                            |                                      | 310        |                                             | -32.86                                      |                                                         |

**Table S3**  $\alpha$ -helical content of HSA determined from CD at 298 K in the presence of cisplatin ( $2 \mu g \cdot mL^{-1}$ ) combination drugs.

| RAPA + Cisplatin                                           |                     | 3-MA + Cisplatin                                           |                     |
|------------------------------------------------------------|---------------------|------------------------------------------------------------|---------------------|
| RAPA Concentration<br>( $\mu\text{g}\cdot\text{mL}^{-1}$ ) | $\alpha$ -Helix (%) | 3-MA Concentration<br>( $\mu\text{g}\cdot\text{mL}^{-1}$ ) | $\alpha$ -Helix (%) |
| 0.02                                                       | 96.09               | 2.00                                                       | 81.11               |
| 0.05                                                       | 87.19               | 6.00                                                       | 64.34               |
| 0.10                                                       | 86.72               | 8.00                                                       | 64.15               |
| 0.30                                                       | 77.64               | 10.00                                                      | 61.09               |
| 0.50                                                       | 76.54               | 12.00                                                      | 48.64               |
| 0.70                                                       | 65.76               | 16.00                                                      | 45.07               |
| 0.75                                                       | 58.27               | 18.75                                                      | 36.47               |

**Table S4** A table for literatures about combination drugs.

| Combination Drugs         |                                              | Title                                                                                                                                                                                                       | Year | Web Site                                                                                                                                                                                                                                                                                                                                                                        |
|---------------------------|----------------------------------------------|-------------------------------------------------------------------------------------------------------------------------------------------------------------------------------------------------------------|------|---------------------------------------------------------------------------------------------------------------------------------------------------------------------------------------------------------------------------------------------------------------------------------------------------------------------------------------------------------------------------------|
| Component A               | Component B                                  |                                                                                                                                                                                                             |      |                                                                                                                                                                                                                                                                                                                                                                                 |
| cisplatin                 | rapamycin                                    | Co-delivery of Cisplatin and Rapamycin for Enhanced Anticancer Therapy through Synergistic Effects and Microenvironment Modulation                                                                          | 2014 | <a href="https://www.ncbi.nlm.nih.gov/pmc/articles/PMC4046782/">https://www.ncbi.nlm.nih.gov/pmc/articles/PMC4046782/</a>                                                                                                                                                                                                                                                       |
| cisplatin                 | 3-methyladenine                              | Concomitant inhibition of AKT and autophagy is required for efficient cisplatin-induced apoptosis of metastatic skin carcinoma                                                                              | 2010 | <a href="http://onlinelibrary.wiley.com/doi/10.1002/jc.25300/abstract?sessionid=0056AD6F0A976ADFBD908D4E57E45BA_f04t03">http://onlinelibrary.wiley.com/doi/10.1002/jc.25300/abstract?sessionid=0056AD6F0A976ADFBD908D4E57E45BA_f04t03</a>                                                                                                                                       |
| cisplatin                 | rapamycin                                    | Combined treatment with cisplatin and sirolimus to enhance cell death in human mesothelioma                                                                                                                 | 2010 | <a href="http://www.sciencedirect.com/science/article/pii/S0022522309009374">http://www.sciencedirect.com/science/article/pii/S0022522309009374</a>                                                                                                                                                                                                                             |
| cisplatin                 | rapamycin                                    | Rapamycin enhances chemotherapy-induced cytotoxicity by inhibiting the expressions of TS and ERK in gastric cancer cells                                                                                    | 2010 | <a href="http://onlinelibrary.wiley.com/doi/10.1002/jc.24990/abstract">http://onlinelibrary.wiley.com/doi/10.1002/jc.24990/abstract</a>                                                                                                                                                                                                                                         |
| cisplatin                 | rapamycin                                    | Synergistic Effect of Rapamycin and Cisplatin in Endometrial Cancer Cells                                                                                                                                   | 2009 | <a href="http://onlinelibrary.wiley.com/doi/10.1002/cncr.24431/abstract">http://onlinelibrary.wiley.com/doi/10.1002/cncr.24431/abstract</a>                                                                                                                                                                                                                                     |
| cisplatin                 | rapamycin                                    | Effect of combination of rapamycin and cisplatin on human cervical carcinoma HeLa cells                                                                                                                     | 2012 | <a href="http://www.termedia.pl/Journal/-3/Strzeszenie-19954">http://www.termedia.pl/Journal/-3/Strzeszenie-19954</a>                                                                                                                                                                                                                                                           |
| cisplatin                 | 3-methyladenine                              | Inhibition of autophagy using 3-methyladenine increases cisplatin-induced apoptosis by increasing endoplasmic reticulum stress in U251 human glioma cells                                                   | 2015 | <a href="https://www.spandidos-publications.com/10.3892/rmmr.2015.3588">https://www.spandidos-publications.com/10.3892/rmmr.2015.3588</a>                                                                                                                                                                                                                                       |
| cisplatin                 | 3-methyladenine                              | ER stress and autophagy are involved in the apoptosis induced by cisplatin in human lung cancer cells                                                                                                       | 2016 | <a href="https://www.spandidos-publications.com/10.3892/or.2016.4680">https://www.spandidos-publications.com/10.3892/or.2016.4680</a>                                                                                                                                                                                                                                           |
| cisplatin                 | 3-methyladenine                              | Inhibition of autophagy enhances cisplatin-induced apoptosis in the MG63 human osteosarcoma cell line                                                                                                       | 2015 | <a href="https://www.spandidos-publications.com/10.3892/ol.2015.3692">https://www.spandidos-publications.com/10.3892/ol.2015.3692</a>                                                                                                                                                                                                                                           |
| oblongifolin C            | guttiferone K                                | Oblongifolin C and guttiferone K extracted from Garcinia yunnanensis fruit synergistically induce apoptosis in human colorectal cancer cells in vitro                                                       | 2017 | <a href="http://www.nature.com/apsjournal/v38/n2/full/aps2016101a.html">http://www.nature.com/apsjournal/v38/n2/full/aps2016101a.html</a>                                                                                                                                                                                                                                       |
| sanguisorba officinalis L | 5-fluorouracil                               | Sanguisorba officinalis L synergistically enhanced 5-fluorouracil cytotoxicity in colorectal cancer cells by promoting a reactive oxygen species-mediated, mitochondria-caspase-dependent apoptotic pathway | 2016 | <a href="http://www.nature.com/articles/srep34245">http://www.nature.com/articles/srep34245</a>                                                                                                                                                                                                                                                                                 |
| FK866                     | gemcitabine<br>5-Fluorouracil<br>oxaliplatin | A pancreatic ductal adenocarcinoma subpopulation is sensitive to FK866, an inhibitor of NAMPT                                                                                                               | 2016 | <a href="http://www.impactjournals.com/oncotarget/index.php?journal=oncotarget&amp;page=article&amp;op=view&amp;path%5b%5d=10776">http://www.impactjournals.com/oncotarget/index.php?journal=oncotarget&amp;page=article&amp;op=view&amp;path%5b%5d=10776</a>                                                                                                                   |
| chloroquine               | primaquine                                   | Anti-malarial Drugs Primaquine and Chloroquine Have Different Sensitization Effects with Anti-mitotic Drugs in Resistant Cancer Cells                                                                       | 2016 | <a href="http://apps.webofknowledge.com/full_record.do?product=WOS&amp;search_mode=GeneralSearch&amp;qid=21&amp;SID=2Cag6jaoGk8HQtkW57&amp;page=1&amp;doc=1">http://apps.webofknowledge.com/full_record.do?product=WOS&amp;search_mode=GeneralSearch&amp;qid=21&amp;SID=2Cag6jaoGk8HQtkW57&amp;page=1&amp;doc=1</a>                                                             |
| 4-hydroxytamoxifen        | isothiocyanates                              | Sensitization of estrogen receptor-positive breast cancer cell lines to 4-hydroxytamoxifen by isothiocyanates present in cruciferous plants                                                                 | 2015 | <a href="https://link.springer.com/article/10.1007%2F950394-015-0930-1">https://link.springer.com/article/10.1007%2F950394-015-0930-1</a>                                                                                                                                                                                                                                       |
| resveratrol               | doxorubicin                                  | Resveratrol-induced autophagy promotes survival and attenuates doxorubicin-induced cardiotoxicity                                                                                                           | 2016 | <a href="http://www.sciencedirect.com/science/article/pii/S1567576916300030">http://www.sciencedirect.com/science/article/pii/S1567576916300030</a>                                                                                                                                                                                                                             |
| YC-1                      | 3-methyladenine                              | Paxlitaxel induces apoptosis accompanied by protective autophagy in osteosarcoma cells through hypoxia-inducible factor-1 alpha pathway                                                                     | 2015 | <a href="https://www.spandidos-publications.com/10.3892/rmmr.2015.3860">https://www.spandidos-publications.com/10.3892/rmmr.2015.3860</a>                                                                                                                                                                                                                                       |
| actinomycin D             | nutin-3a                                     | Actinomycin D and nutin-3a synergistically promote phosphorylation of p53 on serine 46 in cancer cell lines of different origin                                                                             | 2015 | <a href="http://www.sciencedirect.com/science/article/pii/S0898656815001539">http://www.sciencedirect.com/science/article/pii/S0898656815001539</a>                                                                                                                                                                                                                             |
| salinomycin               | valproate                                    | HDAC inhibitors enhance the lethality of low dose salinomycin in parental and stem-like GBM cells                                                                                                           | 2014 | <a href="http://www.tandfonline.com/doi/abs/10.4161/cbt.27309">http://www.tandfonline.com/doi/abs/10.4161/cbt.27309</a>                                                                                                                                                                                                                                                         |
| primaquine                | mefloquine                                   | Co-treatment with the anti-malarial drugs mefloquine and primaquine highly sensitizes drug-resistant cancer cells by increasing P-gp inhibition                                                             | 2013 | <a href="http://www.sciencedirect.com/science/article/pii/S006291X13017762">http://www.sciencedirect.com/science/article/pii/S006291X13017762</a>                                                                                                                                                                                                                               |
| isobavachalcone           | chloroquine                                  | Autophagy inhibition enhances isobavachalcone-induced cell death in multiple myeloma cells                                                                                                                  | 2012 | <a href="https://www.spandidos-publications.com/10.3892/jimm.2012.1066">https://www.spandidos-publications.com/10.3892/jimm.2012.1066</a>                                                                                                                                                                                                                                       |
| resveratrol               | cisplatin<br>carboplatin                     | Resveratrol induces SIRT1-and energy-stress-independent inhibition of tumor cell regrowth after low-dose platinum treatment                                                                                 | 2011 | <a href="https://link.springer.com/article/10.1007%2F9500280-011-1640-x">https://link.springer.com/article/10.1007%2F9500280-011-1640-x</a>                                                                                                                                                                                                                                     |
| sorafenib                 | doxorubicin                                  | Inhibition of doxorubicin-induced autophagy in hepatocellular carcinoma Hep3B cells by sorafenib - the role of extracellular signal-regulated kinase counteraction                                          | 2011 | <a href="http://onlinelibrary.wiley.com/doi/10.1111/j.1742-4658.2011.08271.x/abstract">http://onlinelibrary.wiley.com/doi/10.1111/j.1742-4658.2011.08271.x/abstract</a>                                                                                                                                                                                                         |
| quina crine               | TRAIL                                        | Quina crine sensitizes hepatocellular carcinoma cells to TRAIL and chemotherapeutic agents                                                                                                                  | 2011 | <a href="http://www.tandfonline.com/doi/abs/10.4161/cbt.12.3.17033">http://www.tandfonline.com/doi/abs/10.4161/cbt.12.3.17033</a>                                                                                                                                                                                                                                               |
| curcumin                  | tamoxifen                                    | Chemo-resistant melanoma sensitized by tamoxifen to low dose curcumin treatment through induction of apoptosis and autophagy                                                                                | 2011 | <a href="http://apps.webofknowledge.com/full_record.do?product=WOS&amp;search_mode=GeneralSearch&amp;qid=37&amp;SID=1FNs5qDEKTH9t12PupO&amp;page=2&amp;doc=17&amp;caheutFromRightClick=no">http://apps.webofknowledge.com/full_record.do?product=WOS&amp;search_mode=GeneralSearch&amp;qid=37&amp;SID=1FNs5qDEKTH9t12PupO&amp;page=2&amp;doc=17&amp;caheutFromRightClick=no</a> |
